# Supplementary material for: YY-1224, a terpene trilactone-strengthened Ginkgo biloba, attenuates neurodegenerative changes induced by β-amyloid (1-42) or double transgenic overexpression of APP and PS1 via inhibition of cyclooxygenase-2
Source: PubMed Central journal article supplement (PMC5408406; doi:10.1186/s12974-017-0866-x), 2017-04-27
Supplement: 12974_2017_866_MOESM1_ESM.pdf [file 12974_2017_866_MOESM1_ESM.pdf]

**a**

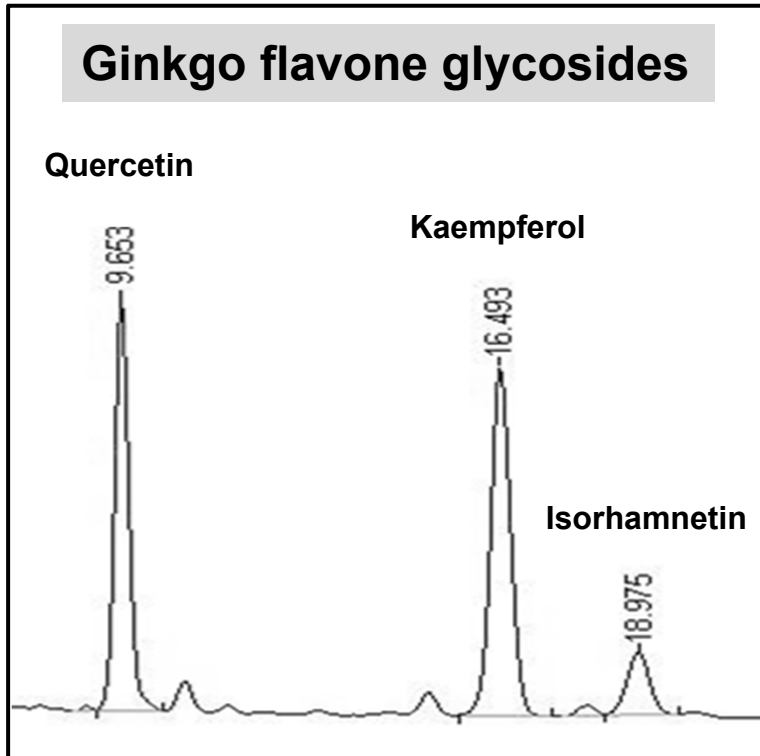

**b**

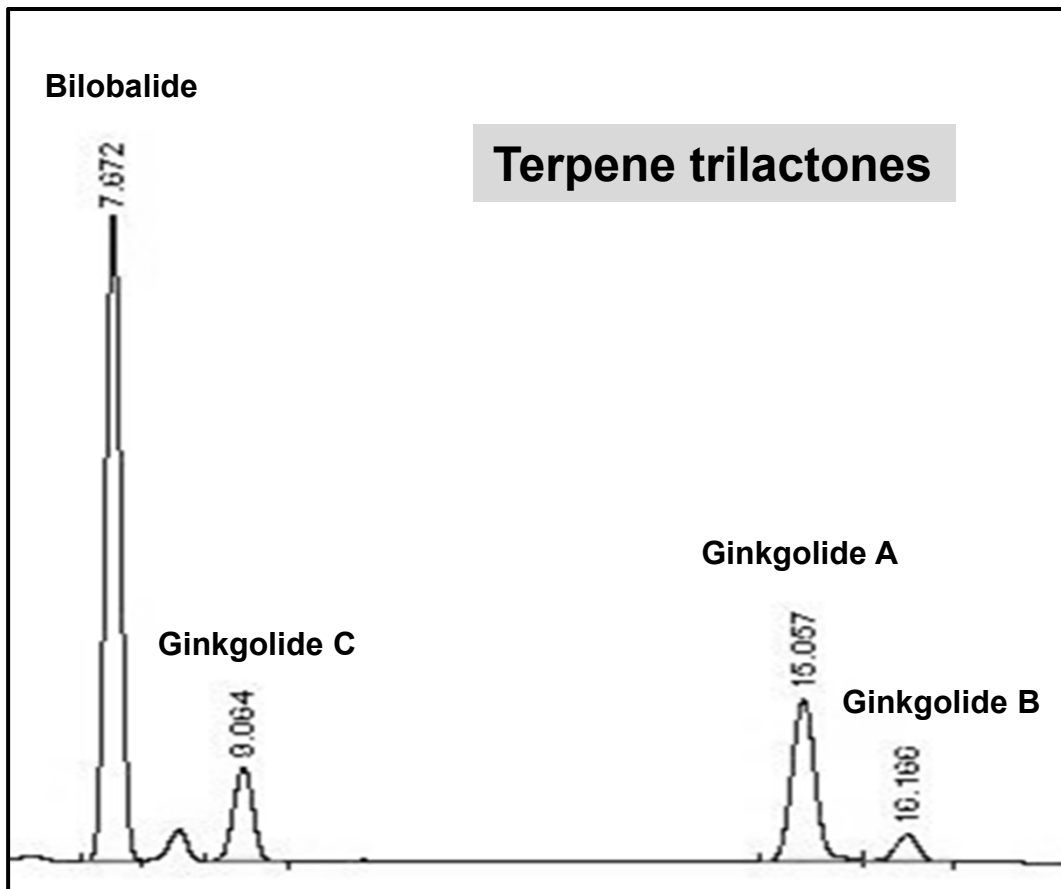

**Supplemental Fig. 1**

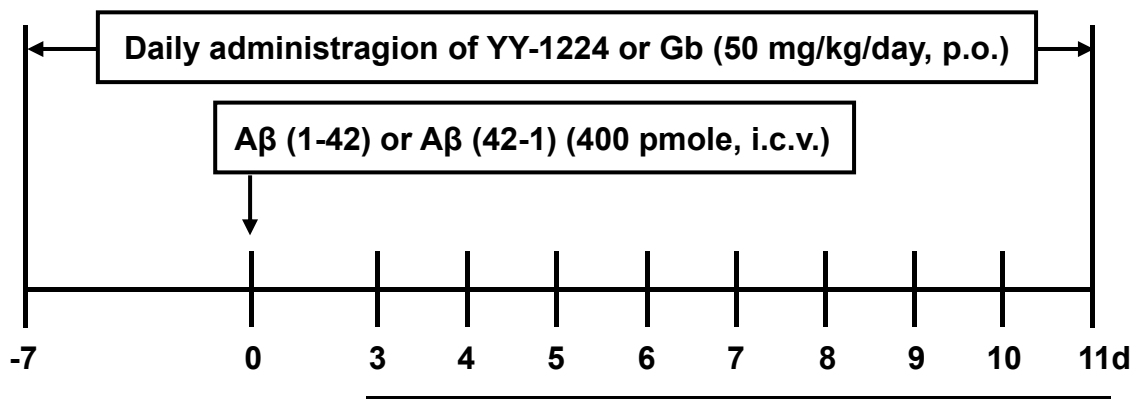

**Morris water maze**

- Reference memory test (3-7d)
- Probe test (8d)
- Working memory test (9-11d)

**Supplemental Fig. 2**

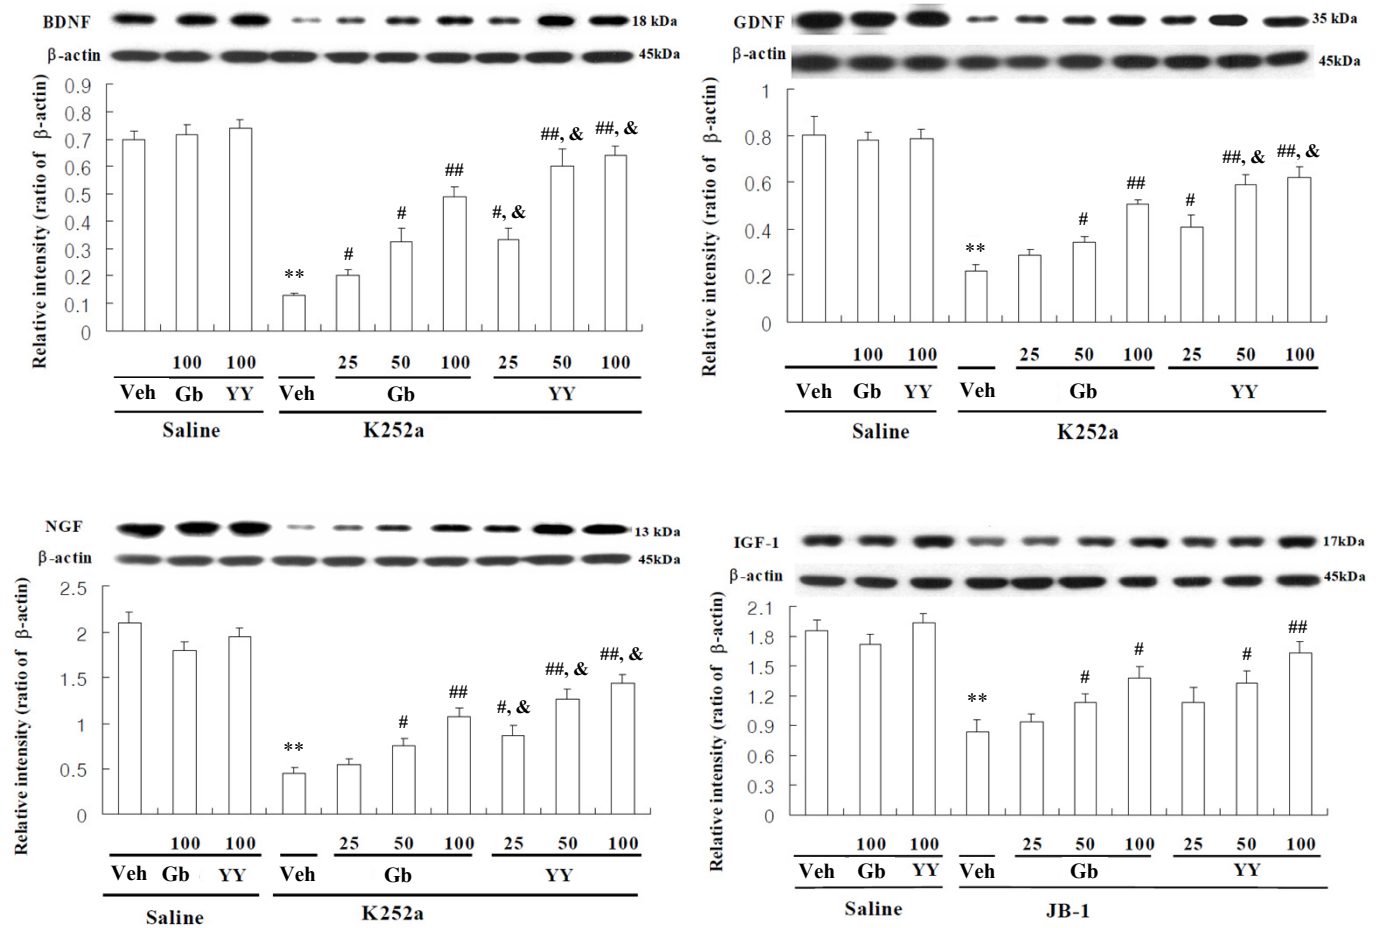

**Supplemental Fig. 3**

**a**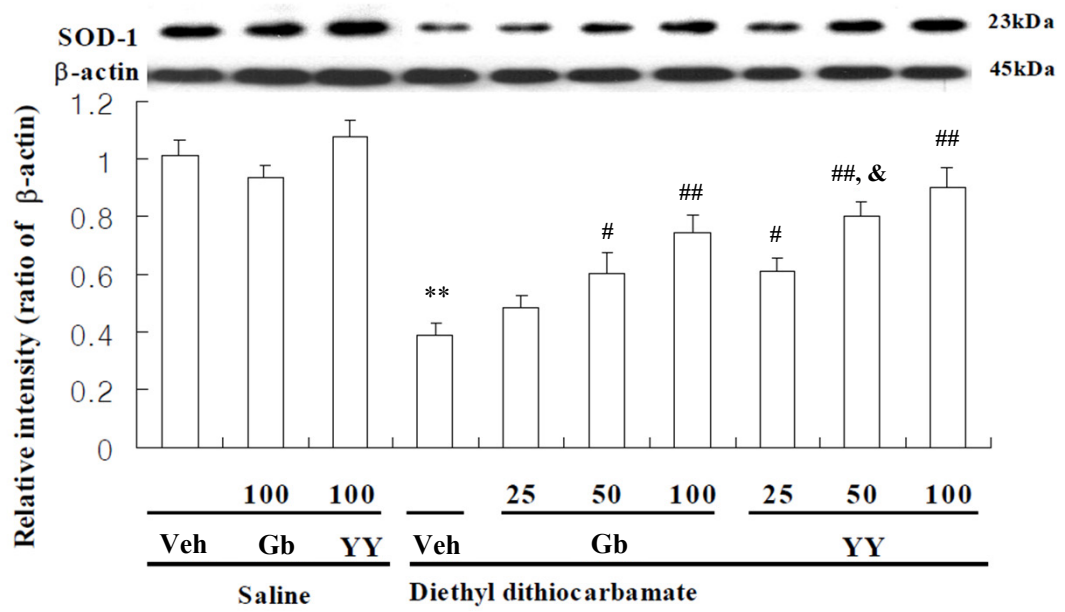**b**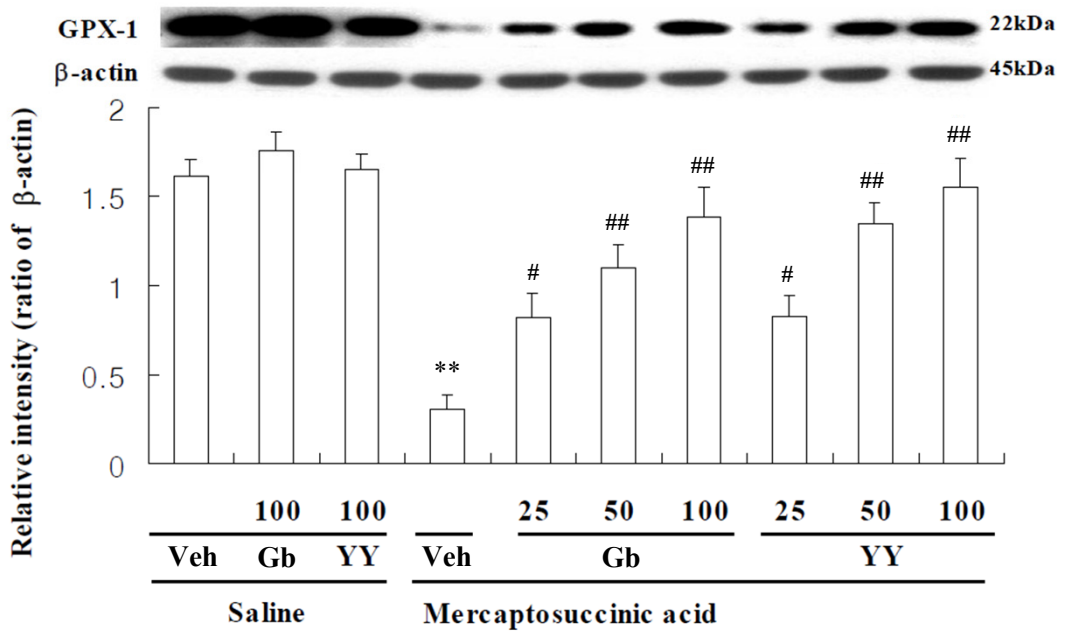**Supplemental Fig. 4**

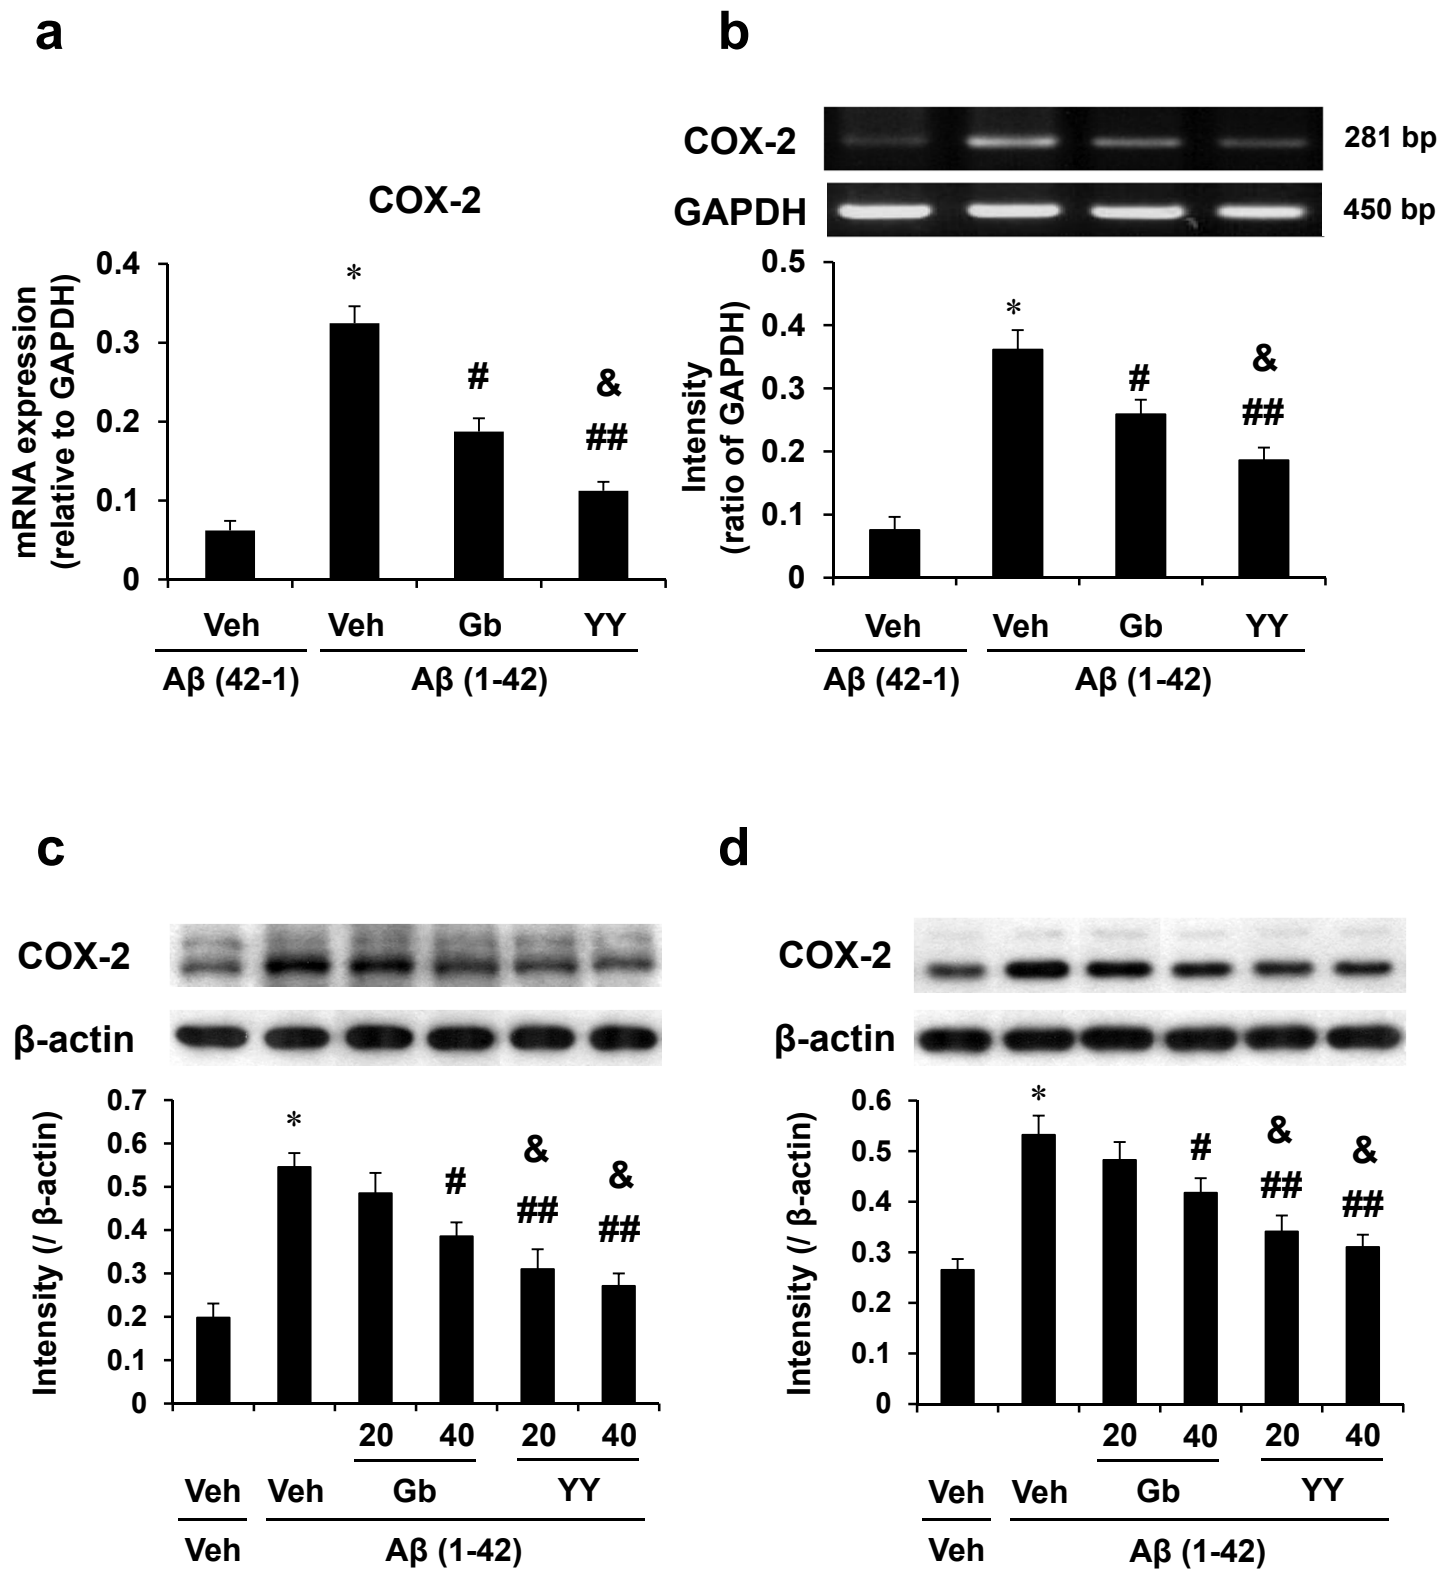

Supplemental Fig. 5

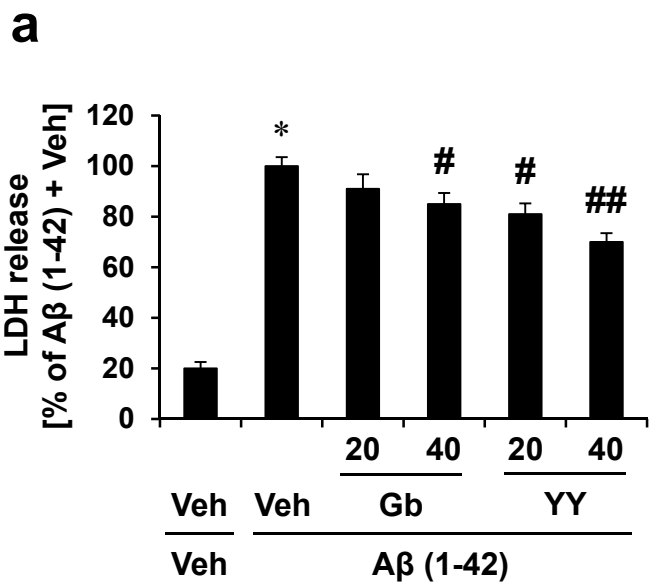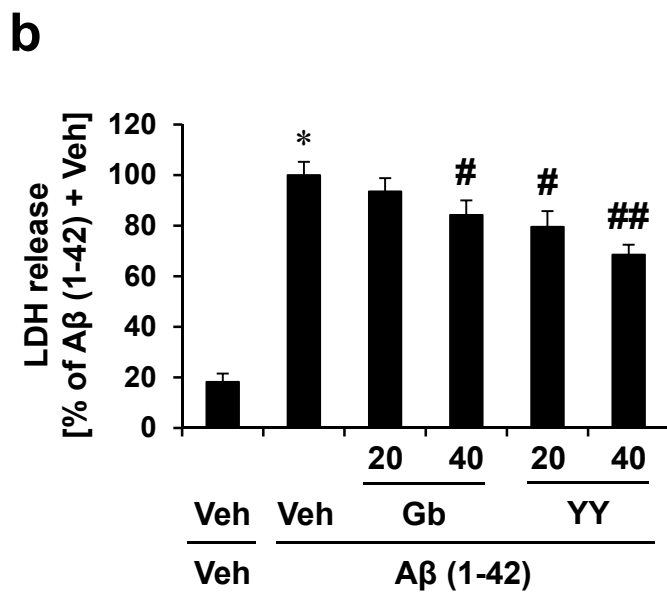

**COX-2 (+/+) mice**

**COX-2 (-/-) mice**

**a**

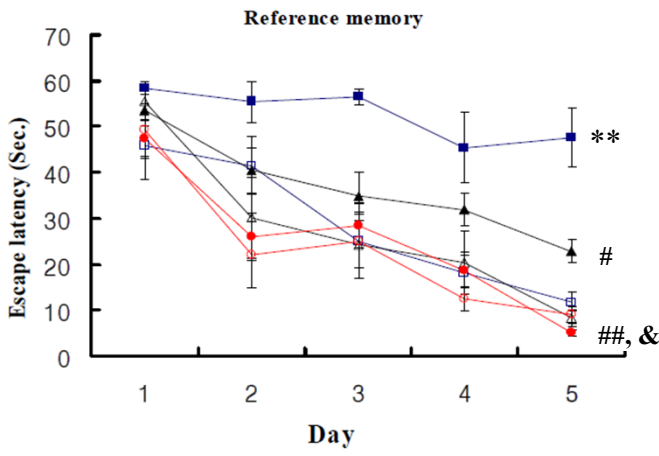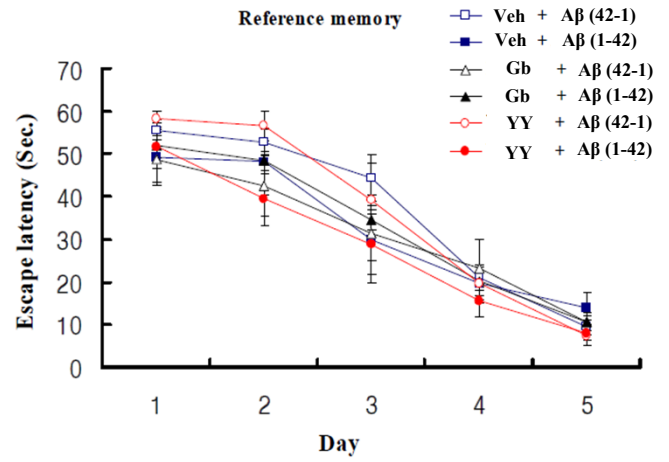

**b**

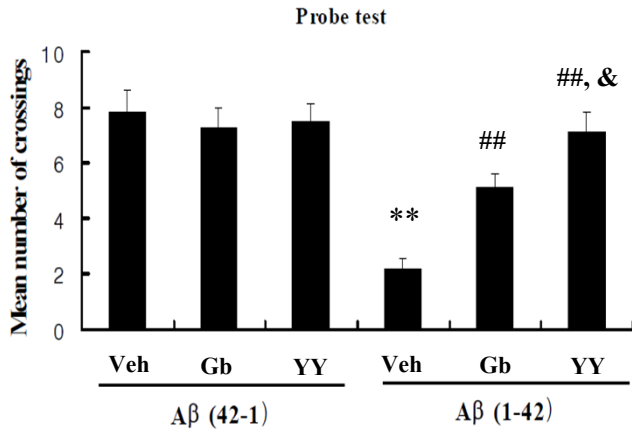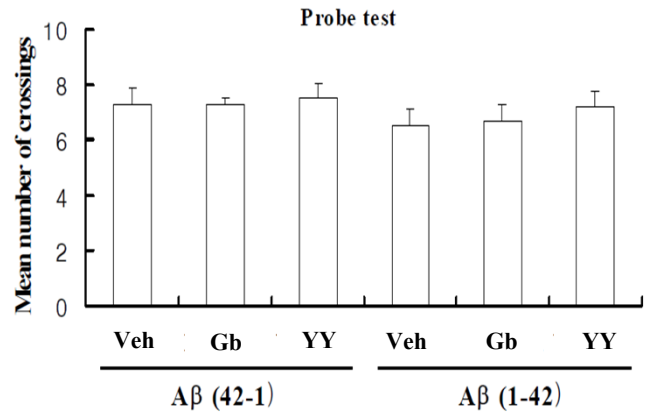

**c**

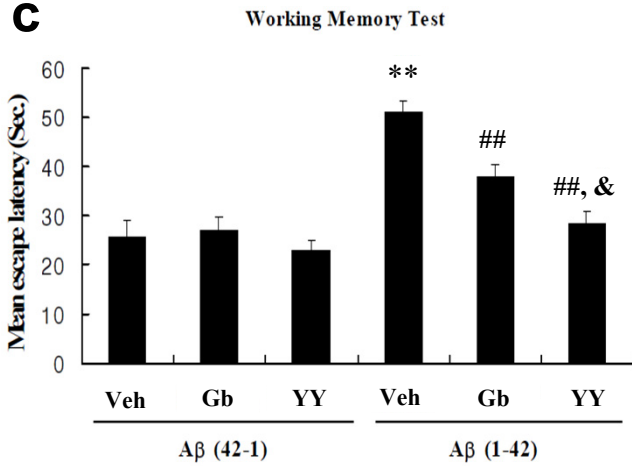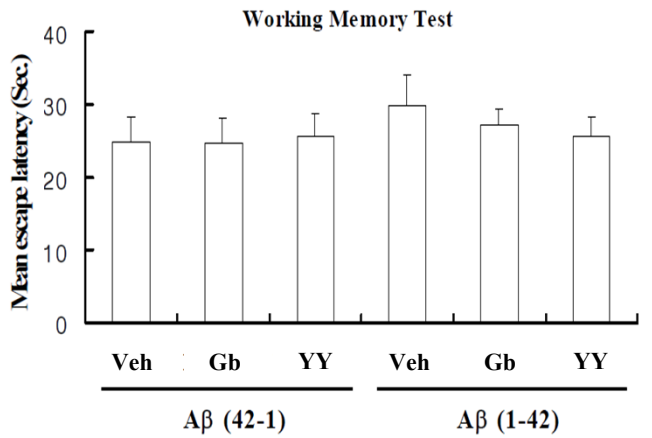

**Supplemental Fig. 7**

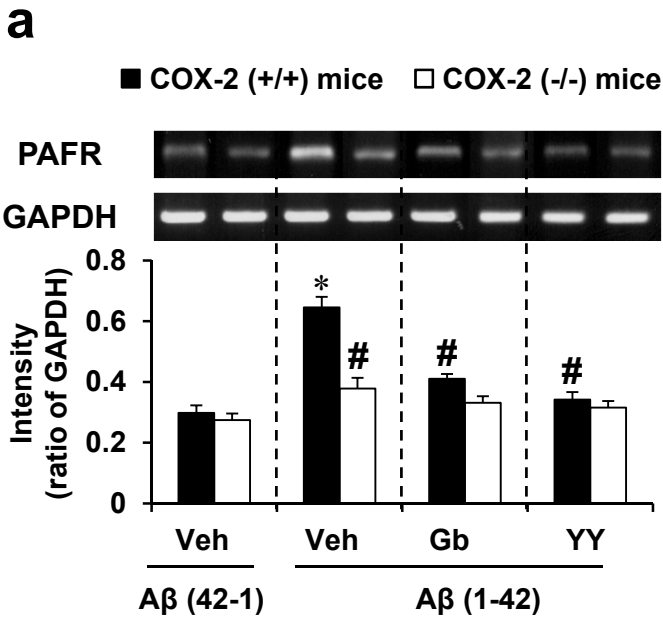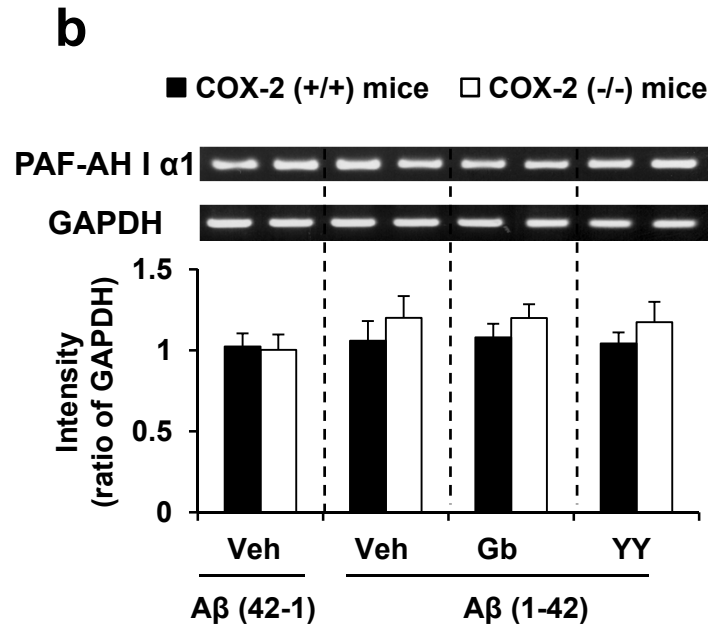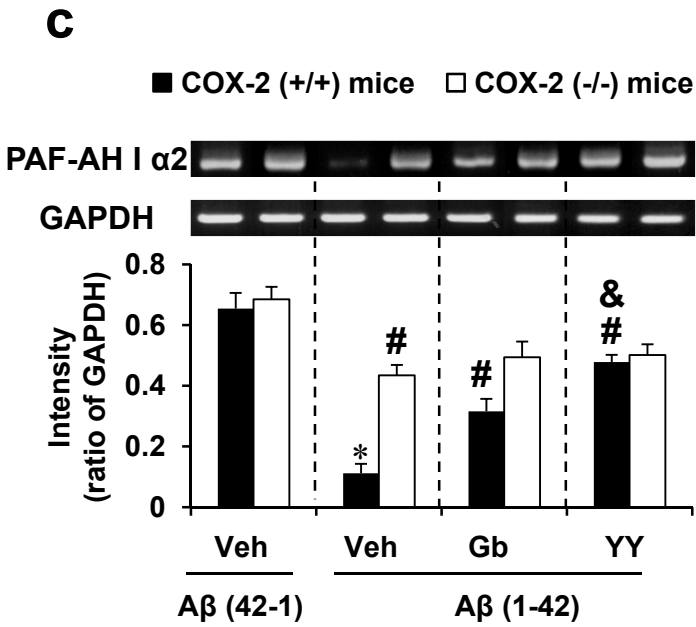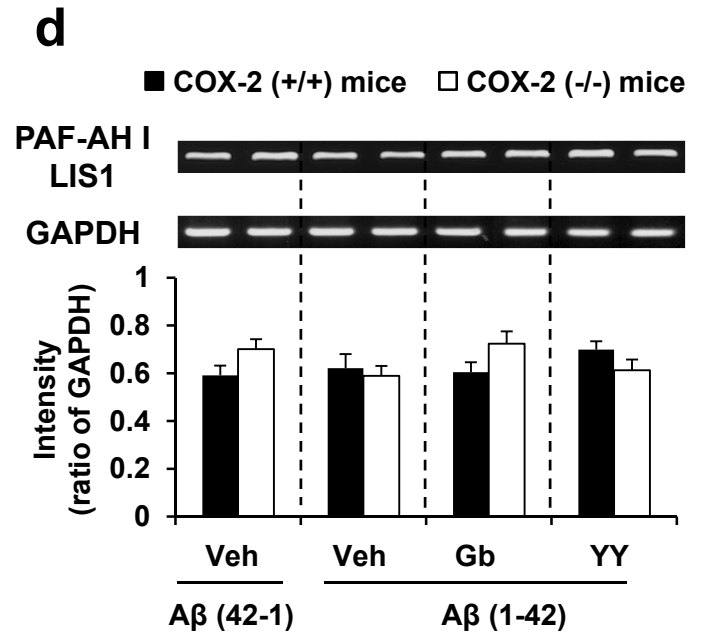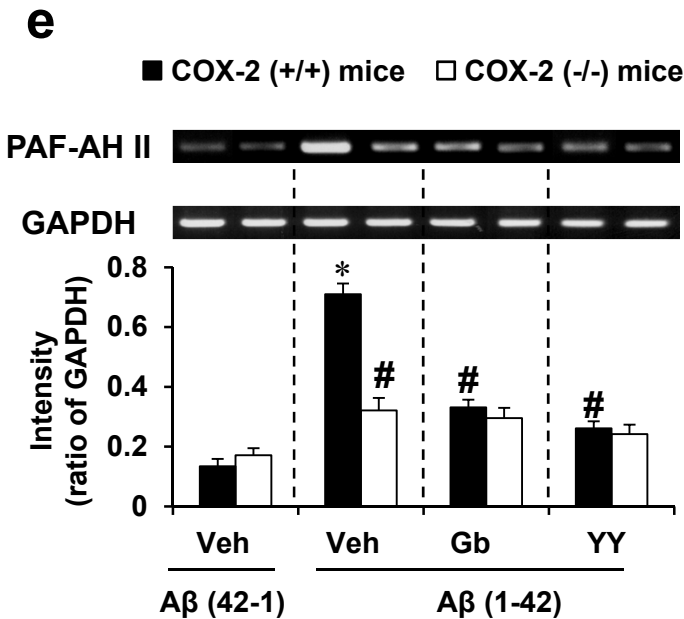

Supplemental Fig. 8



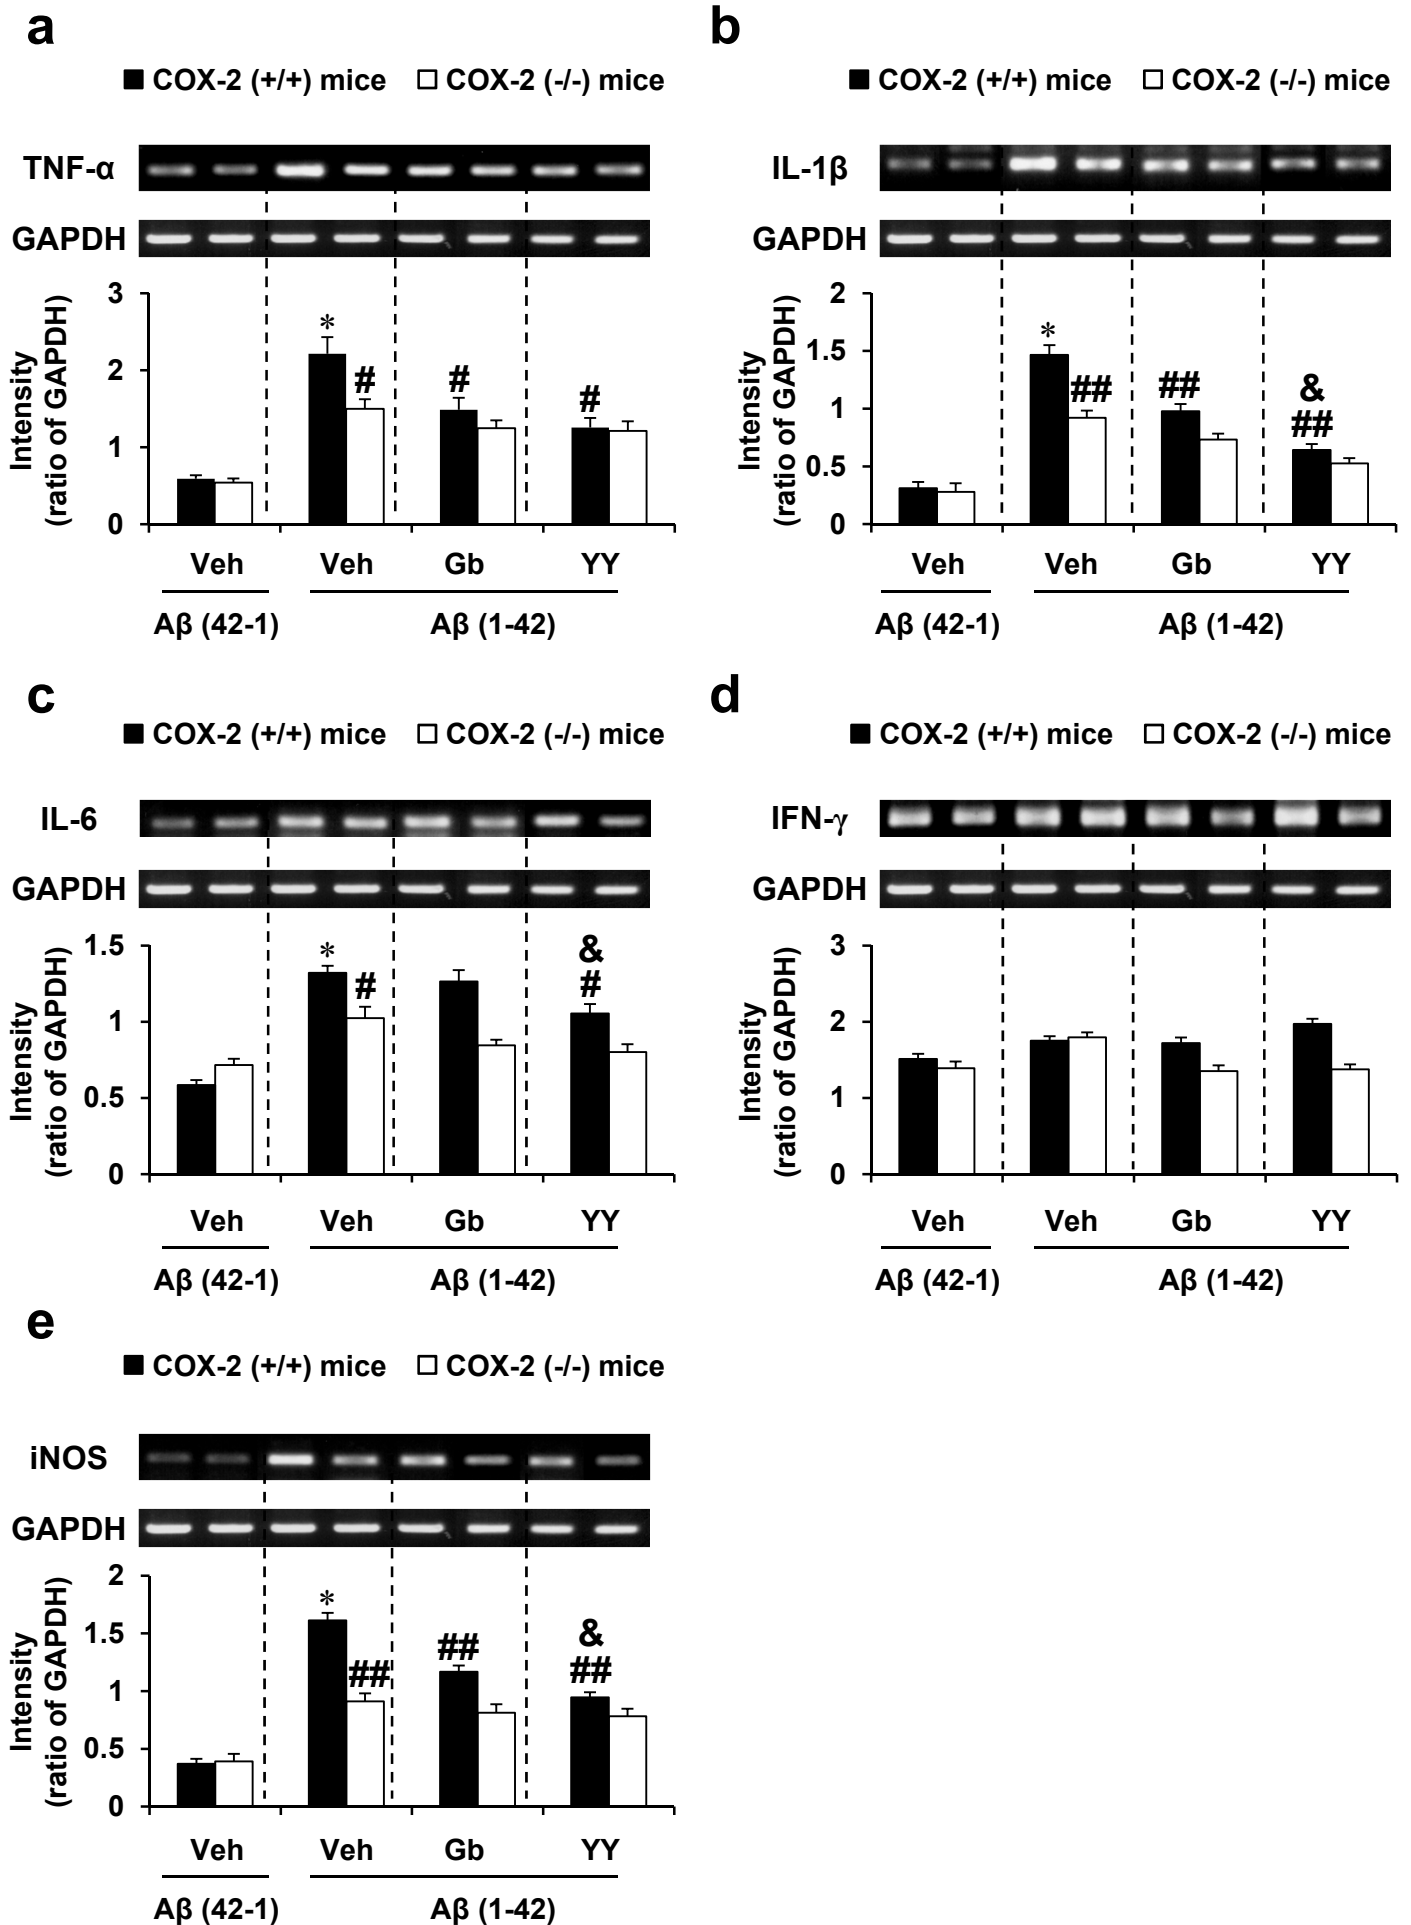

Supplemental Fig. 9

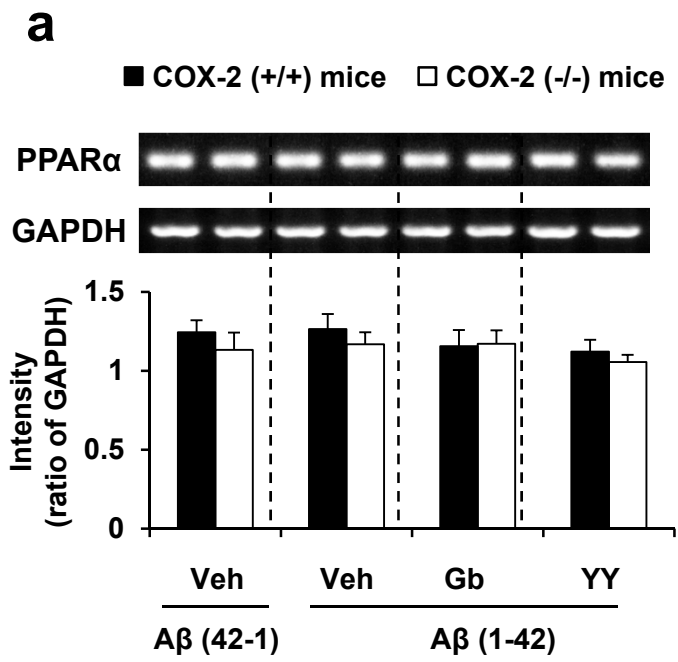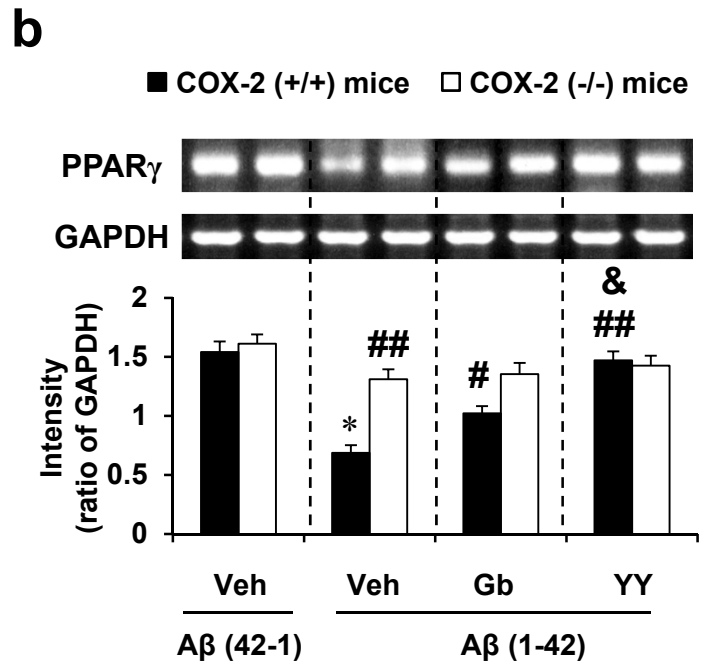

Supplemental Fig. 10

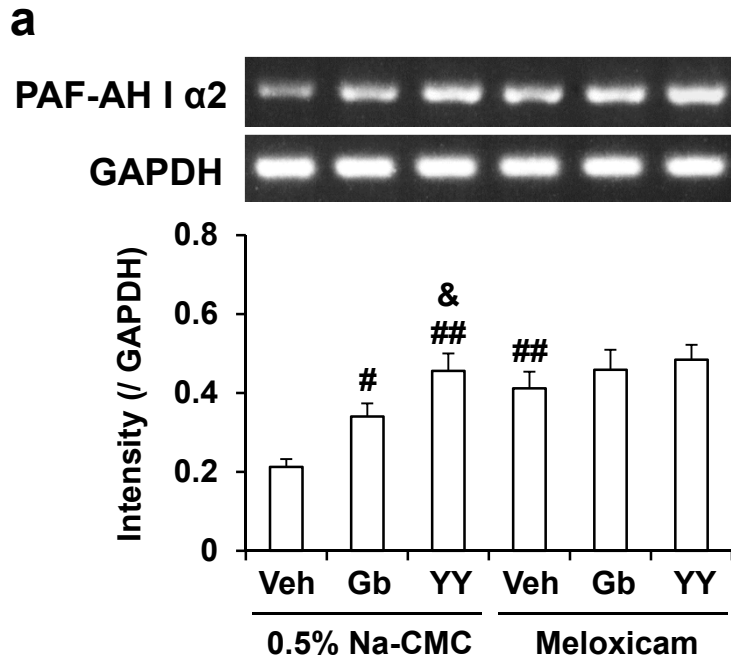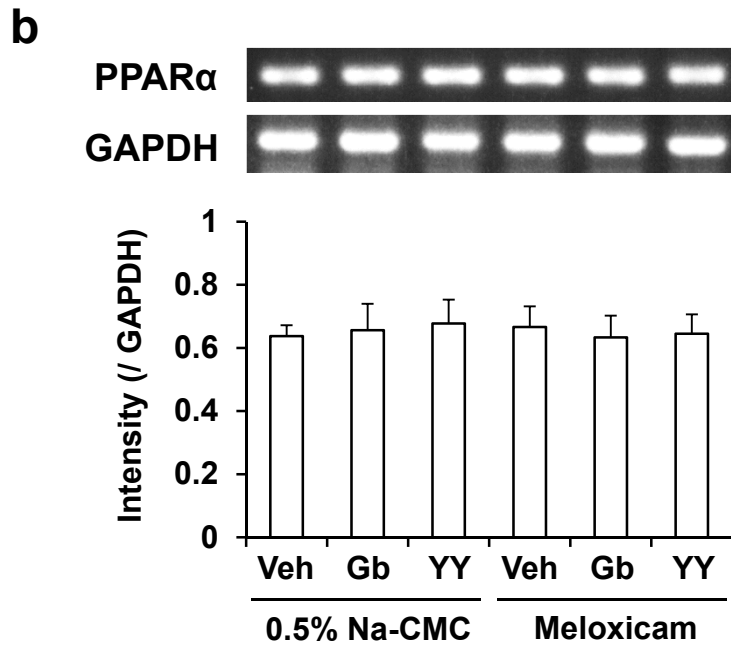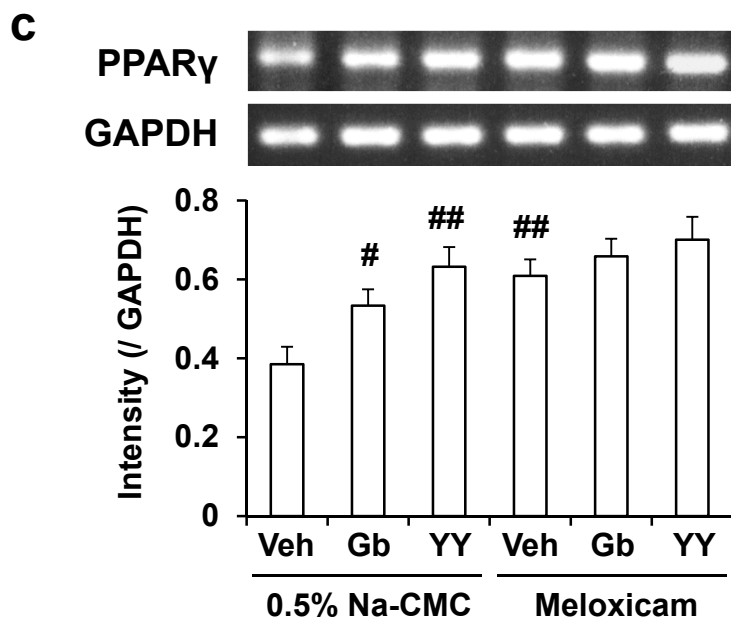

Supplemental Fig. 11

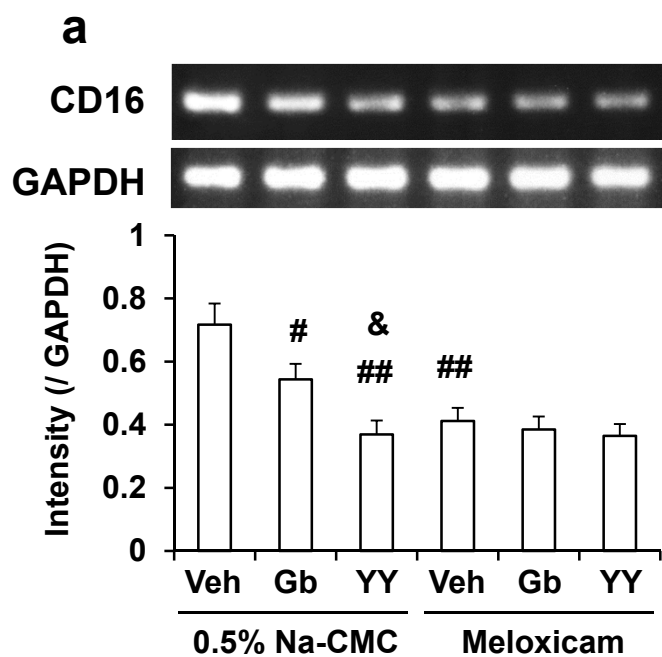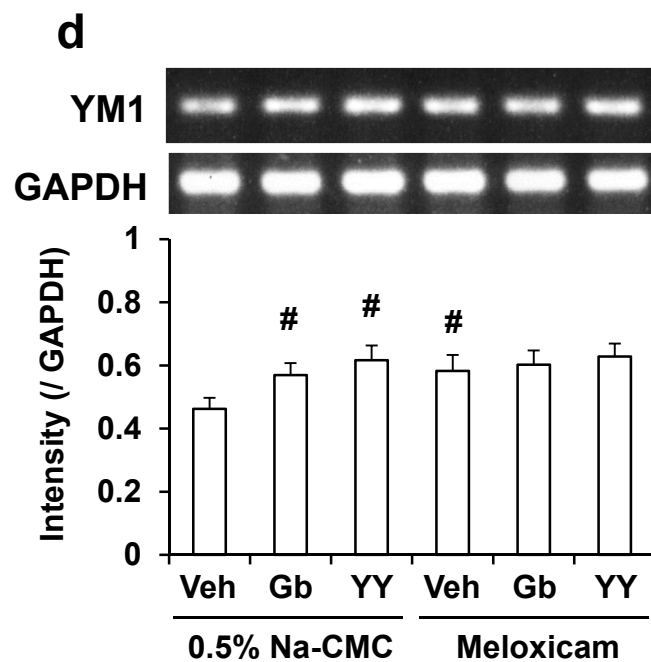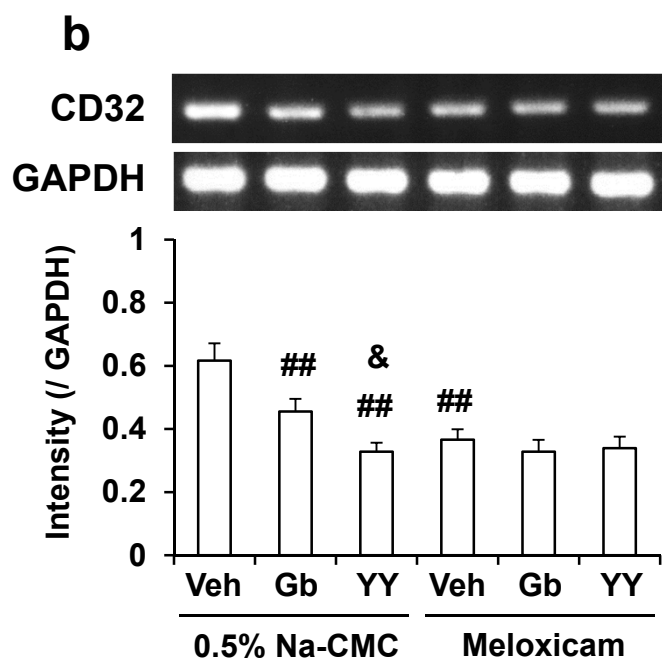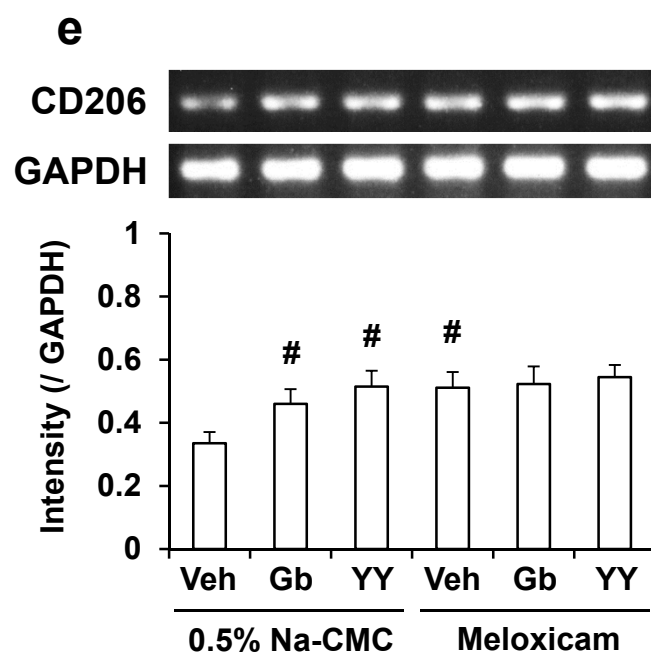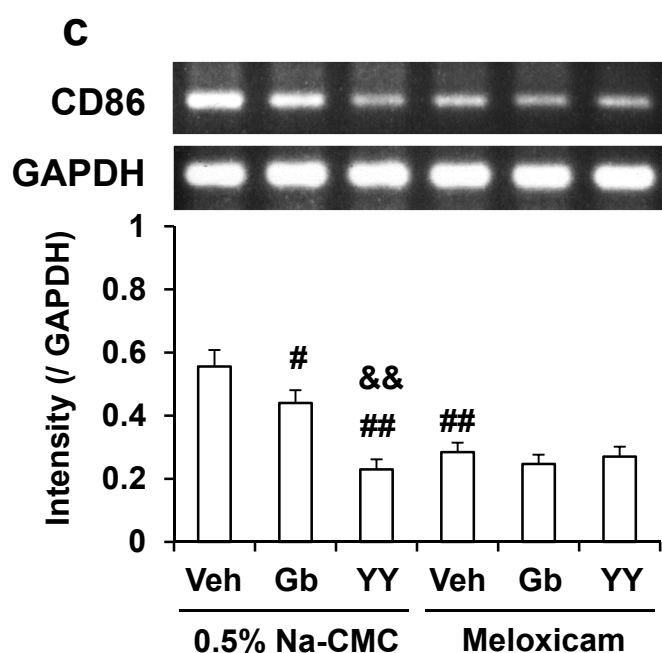

Supplemental Fig. 12

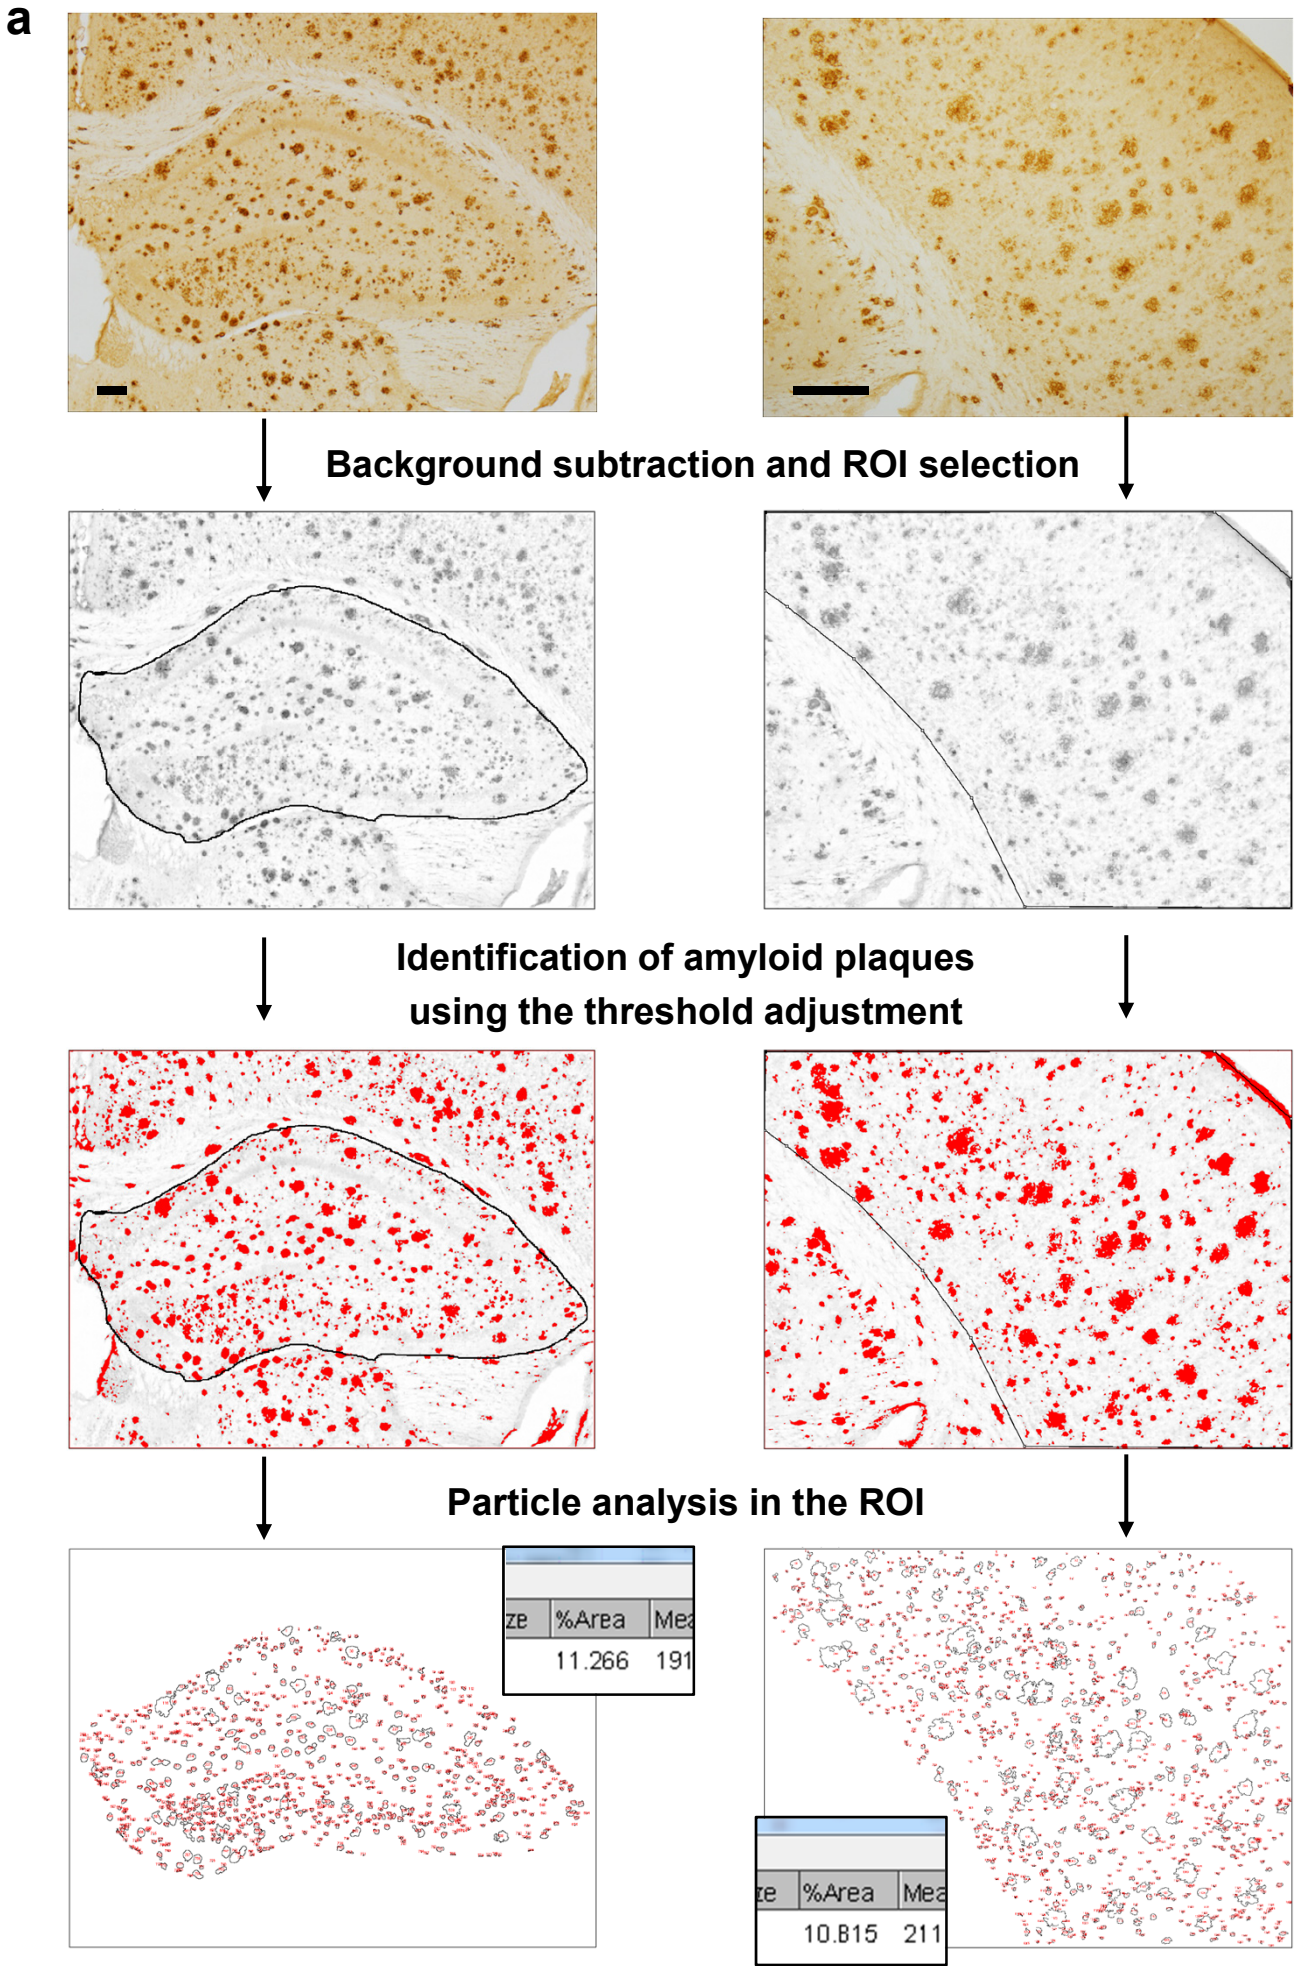

**Supplemental Fig. 13**

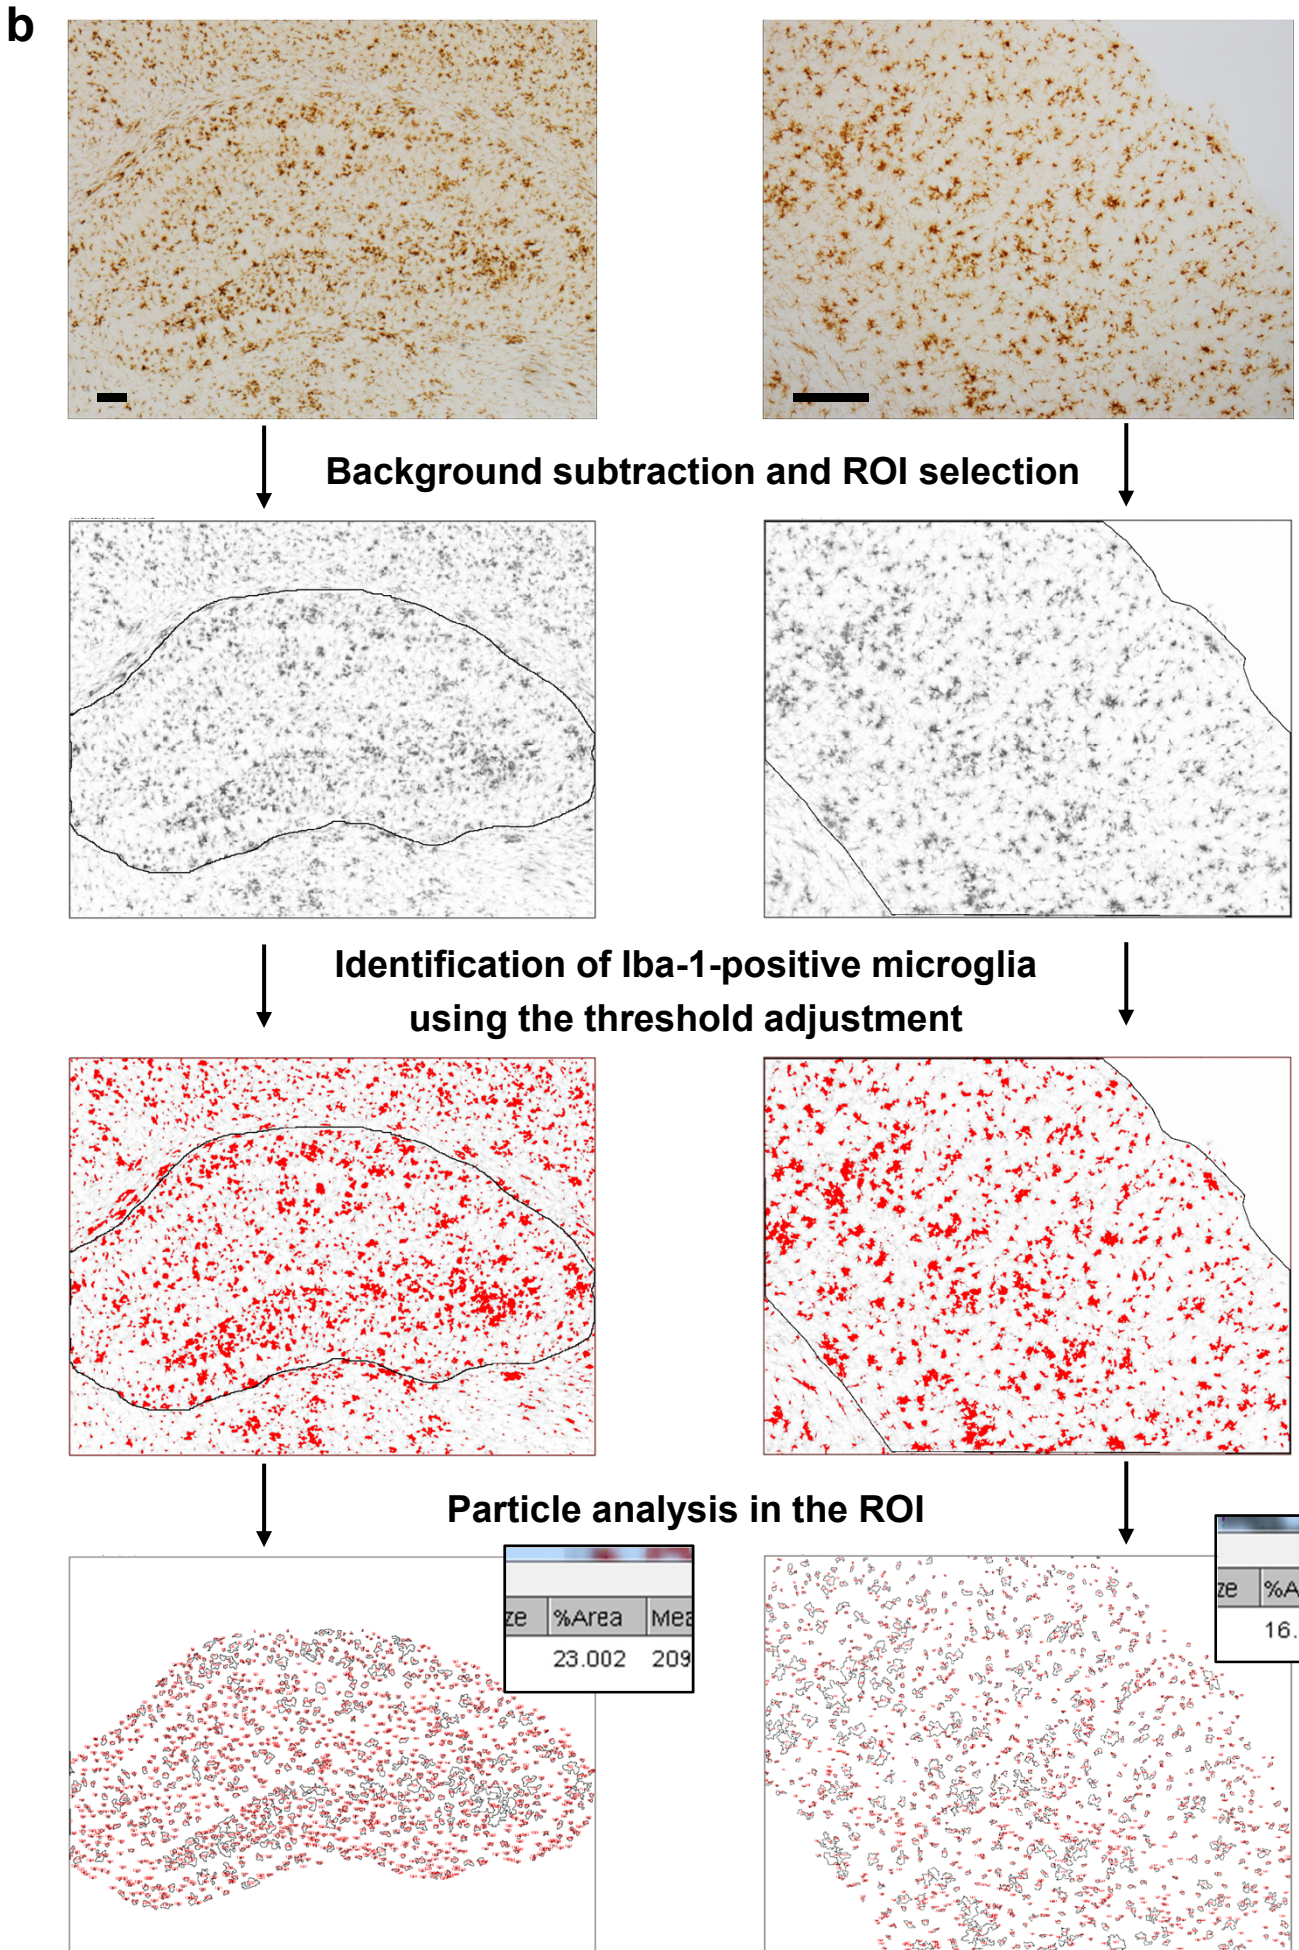

**Supplemental Fig. 13 (continued)**
